# Supplementary material for: Characterization of the RpoN regulon reveals differential regulation of T6SS and new flagellar operons in Vibrio cholerae O37 strain V52
Source: PubMed Central journal article supplement — Nucleic Acids Res. 2012 Jun 21;40(16):7766–75. doi: 10.1093/nar/gks567 (PMC3439928; doi:10.1093/nar/gks567), 2012-06-21
Supplement: supp_gks567_nar-00736-v-2012-File007.pdf [file supp_gks567_nar-00736-v-2012-File007.pdf]

## Supplementary Materials

**Figure S1. Genomic structure of T6SS related genes in *V. cholerae*.** The major T6SS cluster starts from VCA0107 and encode for structural components of T6SS including sheath (VipAB), ATPase (ClpV), IcmF homologue (VasK), DotU, and secreted VgrG3. The two separate *hcp* operons encode secreted Hcp and VgrG proteins that resembles T4 phage tail tube and spike proteins.

**Figure S2. Confirmation of ChIP-Seq by qPCR.** The ribosomal RNA *rrsA* was used as an internal control. Experiments were performed in biological triplicate.

**Table S1. Primers used in this study.**

**Table S2. ChIP-Seq identified binding peaks.**

**Table S3. RpoN positively-regulated operons by RNA-Seq analysis.**

**Table S4. Genes expressed higher in the *rpoN* mutant.**

**Figure S1.**

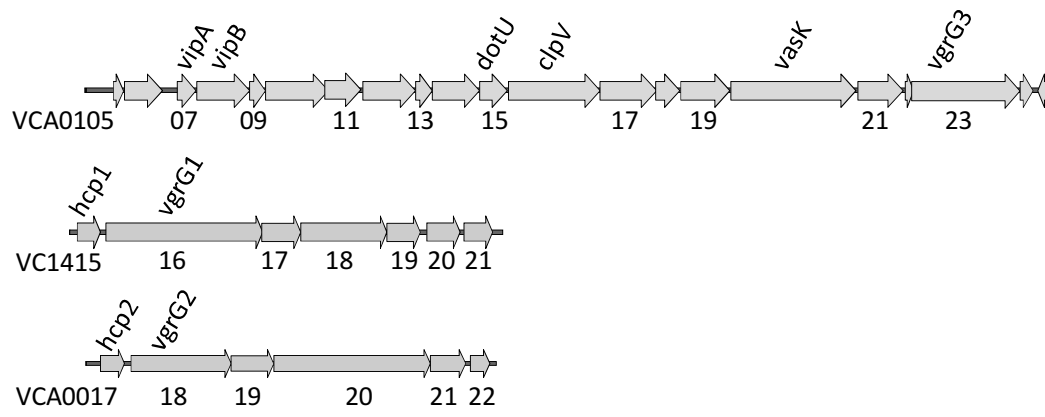

Figure S2.

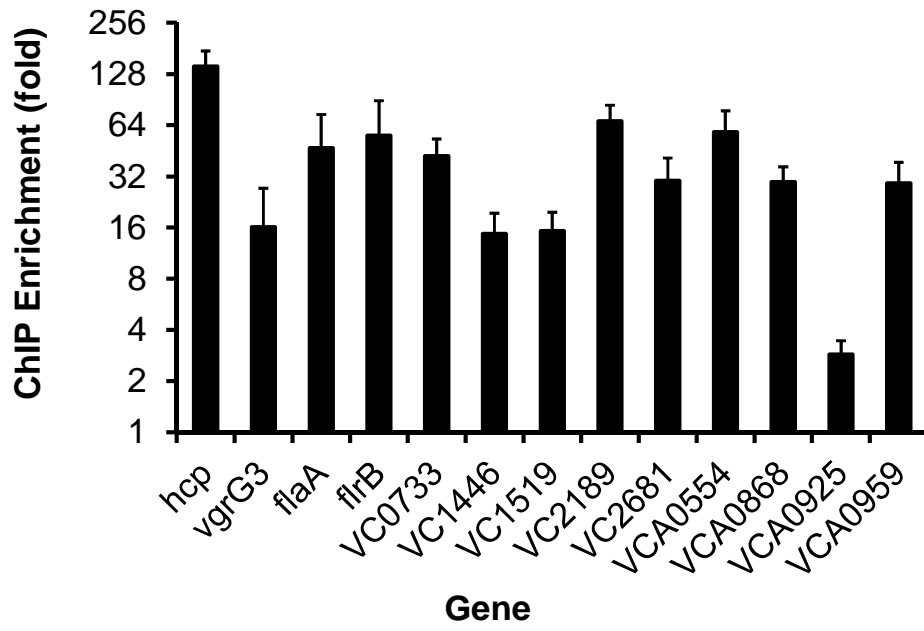

**Table S1**

| <b>Primer</b> | <b>Sequence</b>                              | <b>Note</b>     |
|---------------|----------------------------------------------|-----------------|
| rpoN1         | AAAAAAGGGCCCAGTCAGGACAGATTGTGG               | rpoN-KO         |
| rpoN4         | AAAAAACTCGAGTTATCGTTGAGGCGTTCT               | rpoN-KO         |
| rpoN2         | TTTCCTTCTCTAGTTTAGGCGCAGTAATGGATGCCTTGTT     | rpoN-KO         |
| rpoN3         | AACAAGGCATCCATTACTGCGCCTAACTAGAGAAGGAAA      | rpoN-KO         |
| rpoNcf        | TGGCAAAGGGCGCGTCTCTA                         | rpoN-KO         |
| rpoNcr        | TAAAGGCTGTCAGCAGGCTGACGG                     | rpoN-KO         |
| VbrpoN5'      | ATAGGTACCAGGAGGAAACGATGAAACCGTCATTACAGCTCAAG | rpoN-pBAD       |
| VbrpoN3'      | ATAGTCGACTAGCAGGCGTTTGCCTGACT                | rpoN-pBAD       |
| vc1418f       | ATAGGTACCAGGAGGAAACGATGGATTCAATTAATTATTGCGTG | VC1418-pBAD     |
| vc1418r3v5    | ATAGTCGACTCTTATTTGCACCTTGATTTTCATCT          | VC1418-pBAD     |
| flaX-ko1      | AAAAAAGGGCCCAGTTCTAGCTCGGGTGAAGC             | flaX-KO         |
| flaX-ko2      | GCAGTTTGAAGTGAAGAGCTACATACCCACGTCTGAGCTC     | flaX-KO         |
| flaX-ko3      | GAGCTCAGACGTGGGTATGTAGCTCTCTCACTCAAAGTGC     | flaX-KO         |
| flaX-ko4      | AAAAAACTCGAGATTAAGCTCATCATTCAACG             | flaX-KO         |
| flaX-ko5      | ATCTCAGATTCTGCAACAGGCGG                      | flaX-KO         |
| flaX-ko6      | GCCCTAAACCCCTCTGAAATCTATGC                   | flaX-KO         |
| flaX-cpfd     | ataTGCCAcacagggcgggactcaattc                 | flaX-complement |
| flaX-cprv     | atagaattcGAGAACCGTTCTTCAGCGG                 | flaX-complement |
| flaXr         | TGGTAGCCATCGCCAATGTGG                        | qPCR            |
| flaXr2        | GAAATGAACACATTTTCGGCTAACC                    | qPCR            |
| flaXf1        | CGAGCTCTCTCACTCAAAGTGC                       | qPCR            |
| flaXf2        | CCAAATCTCAGATTCTGCAACAGG                     | qPCR            |
| rrsArt1       | ACCTTACCTACTCTTGACATCCA                      | qPCR            |
| rrsArt2       | CCCAACATTTCAACACGAG                          | qPCR            |
| hcp1rt1       | TACCGACTGACCCACAATCT                         | qPCR            |
| hcp1rt2       | AACCGACTTCAGCTTCTCAC                         | qPCR            |
| vgrG2rt1      | ATCTTGACCCTGCGATGAAC                         | qPCR            |
| vgrG2rt2      | ATGCCCTGGAATTAAGCTGA                         | qPCR            |
| VCA0107F      | TTTCAAATCCTTAGCCGACTTC                       | qPCR            |
| VCA0107R      | TAATGACTGTAACGCTCACGA                        | qPCR            |
| VCA0108F      | CCCAAATACCAAAGAAGGCAA                        | qPCR            |
| VCA0108R      | TCTTTCCAAGCACCGATCTG                         | qPCR            |
| hcpf          | AGCTTTTTGCTTTGTTGATGGGACT                    | ChIP-qPCR       |
| hcpr          | GAGTTGGCATGGCTATTTCTTTTCA                    | ChIP-qPCR       |
| flrBf         | GCAACGCTAGGGAAACCATAGTCA                     | ChIP-qPCR       |
| flrBr         | GCACTGCGCTGCTCATCATTC                        | ChIP-qPCR       |
| flaAf         | AAGCCATATGAGCGAAGTGAGTTGA                    | ChIP-qPCR       |
| flaAr         | CCCTGTACAACTTTTACCAAGGCT                     | ChIP-qPCR       |
| vca0107f      | ACTGTTTCATTGACAACGTTTGGCA                    | ChIP-qPCR       |
| vca0107r      | CCCGTCGCCGGAATATACTTGATAT                    | ChIP-qPCR       |
| vgrG3f        | GTTGAAAATATTGCGTGGCAGTCAA                    | ChIP-qPCR       |
| vgrG3r        | CAGAGTTAACCCTGGTGCGAAACA                     | ChIP-qPCR       |
| vca0868fp     | CCTTAACATTCTTCTAGTGCGA                       | ChIP-qPCR       |
| vca0868rp     | TGTGTCCATATCGTCATCCT                         | ChIP-qPCR       |
| vc2189f       | TTGCCGCTTTGGTTACCC                           | ChIP-qPCR       |
| vc2189r       | CATATGAGCGAAGTGAGTTGAG                       | ChIP-qPCR       |
| vc1446f       | TAGTACCACACTCATATTGCGG                       | ChIP-qPCR       |
| vc1446r       | TGCTGGTGGATGGAATGG                           | ChIP-qPCR       |
| vca0925f      | GTCACGCTCACCAAGCAA                           | ChIP-qPCR       |
| vca0925r      | TACTTCACTGTCCACTCGAT                         | ChIP-qPCR       |
| vc0733f       | CGTGGGATAAAGGTGTTGGA                         | ChIP-qPCR       |
| vc0733r       | AACGCTTGCCATTGTCTG                           | ChIP-qPCR       |
| vc2681f       | CGTGGGATAAAGGTGTTGGA                         | ChIP-qPCR       |
| vc2681r       | AACGCTTGCCATTGTCTG                           | ChIP-qPCR       |
| vca0959f      | AACGTCAGTTGGCTAGGT                           | ChIP-qPCR       |
| vca0959r      | AAAGTTGGCACGTAATCTGC                         | ChIP-qPCR       |
| vca0554f      | CTGCACTCCAGCCAAAGTC                          | ChIP-qPCR       |
| vca0554r      | GCGGGTTTCTGTATCAACCT                         | ChIP-qPCR       |
| vc1519f       | ACCAGTACCTTGCTTTAAGTAGAG                     | ChIP-qPCR       |
| vc1519r       | GTGCAAATCTTGCGGTAGAG                         | ChIP-qPCR       |

Table S2

| Gene     | Name          | Function                                                         | Binding motif    | Intergenic region (IG) | Distance from nearest 5' end (bp) |
|----------|---------------|------------------------------------------------------------------|------------------|------------------------|-----------------------------------|
| VC0174   |               | hypothetical protein                                             | CGGCTCTTTTTTTC   | IG                     | 118                               |
| VC0487   | <i>glmS</i>   | glucosamine--fructose-6-phosphate aminotransferase (isomerizing) | TGGCATCGATCTTGA  |                        | 309                               |
| VC0606   | <i>glnB-1</i> | nitrogen regulatory protein P-II                                 | TGGCACGCCCTTGG   | IG                     | 35                                |
| VC0665   |               | sigma-54 dependent transcriptional regulator                     | TGGGCATTTGTTGGC  | IG                     | 135                               |
| VC0733   |               | hypothetical protein                                             | TGGTATAGCTTATGC  |                        | 705                               |
| VC1008   | <i>motY</i>   | sodium-type flagellar protein MotY                               | TGGCTAGATTTTTGC  |                        | 73                                |
| VC1020   |               | hypothetical protein                                             | TGGCACGATATGTGC  | IG                     | 132                               |
| VC1064   |               | lipoprotein, putative                                            | TGGCATATAAATTC   | IG                     | 44                                |
| VC1144   | <i>clpA</i>   | ATP-dependent Clp protease, ATP-binding subunit ClpA             | TGGCACGTTTACTGC  |                        | 127                               |
| VC1154   |               | hypothetical protein                                             | TGGCACTCTAATTC   | IG                     | 186                               |
| VC1171   |               | indole-3-glycerol phosphate synthase                             | TGGCGCGAATCTTGC  |                        | 582                               |
| VC1229   |               | membrane protein, putative                                       | TAGCACGTTTTATGC  | IG                     | 85                                |
| VC1252   |               | CinA family protein                                              | CGGTATAATAAATTC  |                        | 313                               |
| VC1269   |               | lipoprotein, putative                                            | TAGCACGTTTTATGC  | IG                     | 71                                |
| VC1384   |               | hypothetical protein                                             | AGGTACGAAATTC    |                        | 92                                |
| VC1415   | <i>hcp-1</i>  | hcp protein                                                      | TGGCATCCCCTTGC   | IG                     | 94                                |
| VC1446*  |               | toxin secretion transporter                                      | TGGAATGGATCTTGC  |                        | 1633                              |
| VC1516   |               | iron-sulfur cluster-binding protein                              | TGGAACGCTAATTC   | IG                     | 72                                |
| VC1518   |               | hypothetical protein                                             | TGGCGCAATTTATGC  | IG                     | 54                                |
| VC1519*  | <i>fdhD</i>   | formate dehydrogenase accessory protein                          | CGGCACCCTTTTGC   |                        | 87                                |
| VC1523   |               | conserved hypothetical protein                                   | TGGCATCCCCTTGC   | IG                     | 117                               |
| VC1678   | <i>pspA</i>   | phage shock protein A                                            | TGGATTTATCTTTC   | IG                     | 88                                |
| VC1699   |               | hypothetical protein                                             | TGGCATCGGTTTTGC  | IG                     | 130                               |
| VC1988   |               | conserved hypothetical protein                                   | TGGCATTGGAATTC   |                        | 549                               |
| VC2005   |               | hypothetical protein                                             | AGGCACAGCATTTGC  | IG                     | 109                               |
| VC2068   |               | flagellar biosynthetic protein FlhF, putative                    | TGGAACAAATTTGC   |                        | 306                               |
| VC2069   | <i>flhA</i>   | flagellar biosynthetic protein FlhA                              | TGGACTGAAAATTC   | IG                     | 211                               |
| VC2128   |               | flagellar hook-length control protein FliK, putative             | TGGCTTACTTCTTGC  | IG                     | 100                               |
| VC2134   | <i>fliE</i>   | flagellar hook-basal body complex protein FliE                   | TGGCATACAAATTC   | IG                     | 54                                |
| VC2136   | <i>fliB</i>   | flagellar regulatory protein B                                   | TGGCATGACTCTTGC  | IG                     | 51                                |
| VC2140   | <i>fliD</i>   | flagellar rod protein                                            | TGGCACTAAAATTC   |                        | 434                               |
| VC2177   |               | conserved hypothetical protein                                   | CGGTACGAAATTC    |                        | 330                               |
| VC2188   | <i>fliA</i>   | flagellin core protein A                                         | TGGCACACTAATTC   | IG                     | 160                               |
| VC2189   |               | hypothetical protein                                             | TGGCACGGAATTC    | IG                     | 25                                |
| VC2191   | <i>fliK</i>   | flagellar hook-associated protein FlgK                           | TGGCATACATATTC   | IG                     | 77                                |
| VC2193   | <i>fliG</i>   | flagellar P-ring protein FlgI                                    | TGGCACGATTTTTTA  |                        | 119                               |
| VC2196   | <i>fliF</i>   | flagellar basal-body rod protein FlgF                            | TGGCATGTGCTTGC   | IG                     | 52                                |
| VC2200   | <i>fliB</i>   | flagellar basal-body rod protein FlgB                            | TGGTACGCTAATTC   | IG                     | 63                                |
| VC2207   | <i>fliQ</i>   | flagellar membrane protein flgO                                  | GGGTATAAATTTGC   | IG                     | 115                               |
| VC2208   | <i>fliT</i>   | flagellar protein flgT                                           | TGGAACGCTCCTTGC  | IG                     | 106                               |
| VC2287   |               | DNA-damage-inducible protein P                                   | CGGATCGCATAATTC  | IG                     | 120                               |
| VC2396   | <i>envA</i>   | UDP-3-O-3-hydroxymyristoyl N-acetylglucosamine deacetylase       | CGGCACAGCCTTGC   |                        | 252                               |
| VC2453   |               | sensor histidine kinase/response regulator                       | CGGTTGAAAGAAACG  |                        | 192                               |
| VC2499   |               | conserved hypothetical protein                                   | TGGCACGCTGATATGC |                        | 400                               |
| VC2623   | <i>trpS</i>   | tryptophanyl-tRNA synthetase                                     | TGGCACGCTGCTTGA  |                        | 85                                |
| VC2681*  |               | malate dehydrogenase, putative                                   | TGGTATGCTTAATGC  |                        | 545                               |
| VC2746   | <i>glnA</i>   | glutamate--ammonia ligase                                        | TGGCACGCTTTTCGC  |                        | 127                               |
| VC2748   | <i>ntrB</i>   | nitrogen regulation protein                                      | CGGCAAGATTTATGC  |                        | 199                               |
| VCA0017  | <i>hcp-2</i>  | hcp protein                                                      | TGGCATCCCCTTGC   | IG                     | 76                                |
| VCA0041  | <i>glts</i>   | sodium/glutamate symporter                                       | TGGCACGCTTCTGTC  | IG                     | 331                               |
| VCA0051  |               | hypothetical protein                                             | TGGCACAAATTTATGC |                        | 221                               |
| VCA0101  |               | conserved hypothetical protein                                   | CGGCATTGAAAATTC  |                        | 305                               |
| VCA0105  |               | conserved hypothetical protein                                   | TGGAACATTAATTC   | IG                     | 52                                |
| VCA0123  | <i>vgrG-3</i> | vgrG protein                                                     | TGGCATTGAGTTTGC  |                        | 129                               |
| VCA0144  |               | immunogenic protein                                              | TGGCATCTTCTTTC   |                        | 48                                |
| VCA0195  |               | hypothetical protein                                             | CGGCGCATTTATTC   |                        | 217                               |
| VCA0284  |               | hypothetical protein                                             | TGTACAGAAATGAGC  |                        | 43                                |
| VCA0525  |               | hypothetical protein                                             | AGGCACAAATTTGC   |                        | 364                               |
| VCA0546  |               | conserved hypothetical protein                                   | TGGCATATAGCTTGC  |                        | 475                               |
| VCA0554* |               | oxalate/formate antiporter                                       | TGGCATCTTTATGC   |                        | 77                                |
| VCA0734  |               | hypothetical protein                                             | TGGCTGTAAATTC    | IG                     | 53                                |
| VCA0826  |               | hypothetical protein                                             | TGGCACAGATAGTGC  | IG                     | 249                               |
| VCA0868* | <i>pbpG</i>   | D-alanyl-D-alanine endopeptidase                                 | TGGCATCAAATATGC  |                        | 16                                |
| VCA0925* |               | conserved hypothetical protein                                   | CGGCATGCTTCTGTC  |                        | 990                               |
| VCA0959* |               | hypothetical protein                                             | TGGCACGTAATCTGC  |                        | 146                               |
| VCA0973  |               | hypothetical protein                                             | TGGCACTTTATTC    |                        | 197                               |
| VCA1016  |               | lipoprotein, putative                                            | TGGCACGCACTATGC  |                        | 244                               |
| VCA1075  |               | hypothetical protein                                             | CGGAATAAATTC     | IG                     | 71                                |

Note: \* indicates a binding site inside the gene and the distance from its 5' end is shown. Genes underlined are known RpoN-controlled genes. The distance from the binding sites to the nearest 5' end for a gene in the same direction is indicated. IG: intergenic regions.

Table S3

| Operon                         | Gene                  | Function                                               | Fold change (pRpoN/pBAD)           | P value | ChIP-peak |
|--------------------------------|-----------------------|--------------------------------------------------------|------------------------------------|---------|-----------|
| <b>T6SS</b>                    |                       |                                                        |                                    |         |           |
| VC1415-20                      | <i>hcp1/vgrG1</i>     | T6SS secretion                                         | 511.1/61.9/14.8/6.4/7.0/4.7        | 0.001   | ChIP      |
| VCA0017-23                     | <i>hcp2/vgrG2</i>     | T6SS secretion                                         | 532.5/94.1/19.0/14.5/12.7/2.8/3.8  | 0.001   | ChIP      |
| VCA0123                        | <i>vgrG3</i>          | T6SS secretion                                         | 2.4                                | 0.001   | ChIP      |
| <b>Motility and Chemotaxis</b> |                       |                                                        |                                    |         |           |
| VC1008                         | <i>motY</i>           | sodium-type flagellar protein                          | 16.9                               | 0.001   | ChIP      |
| VC1384                         |                       | putative outer membrane protein                        | 7.6                                | 0.000   | ChIP      |
| VC2065-59                      | <i>cheYZAB-W</i>      | chemotaxis                                             | 2.5/2.6/2.5/2.6/2.3/2.3/1.8        | 0.030   |           |
| VC2068-66                      | <i>flhFG-flhA</i>     | flagellar biosynthesis /sigma factor FliA              | 16.2/6.8/3.3                       |         | ChIP      |
| VC2069                         | <i>flhA</i>           | flagellar biosynthesis                                 | 7.4                                | 0.001   | ChIP      |
| VC2123-20                      | <i>fliPQR-flhB</i>    | flagellar biosynthesis                                 | 2.6/2.8/3.1/3.1                    | 0.001   |           |
| VC2125-24                      | <i>fliNO</i>          | flagellar motor switch                                 | 3.3/2.9                            | 0.001   |           |
| VC2126                         | <i>fliM</i>           | flagellar motor switch                                 | 2.0                                | 0.001   |           |
| VC2128                         | <i>fliK</i>           | flagellar hook-length control                          | 36.2                               | 0.001   | ChIP      |
| VC2134-29                      | <i>fliEFGHIJ</i>      | flagellar assembly                                     | 5.6/5.5/5.3/4.7/6.0/6.6            | 0.001   | ChIP      |
| VC2136-35                      | <i>fliRBC</i>         | flagellar regulator                                    | 3.2/2.3                            | 0.001   | ChIP      |
| VC2140-38                      | <i>fliD/flaI/fliS</i> | flagellar rod/hook-associated protein                  | 2.1/3.4/5.2/5.4                    | 0.001   | ChIP      |
| VC2143                         | <i>flaD</i>           | flagellin                                              | 87.9                               | 0.000   |           |
| VC2144                         | <i>flaE</i>           | flagellin                                              | 15.6                               | 0.001   |           |
| VC2187                         | <i>flaC</i>           | flagellin                                              | 54.6                               | 0.001   |           |
| VC2188                         | <i>flaA</i>           | flagellin core protein                                 | 251.0                              | 0.001   | ChIP      |
| VC2189                         |                       | hypothetical protein                                   | 176.4                              | 0.001   | ChIP      |
| VC2191-90                      | <i>flgKL</i>          | flagellar hook-associated protein                      | 79.0/46.2                          | 0.001   | ChIP      |
| VC2193-92                      | <i>flgIJ</i>          | flagellar P-ring /flagellar protien                    | 67.6/47.6                          | 0.001   | ChIP      |
| VC2196-94                      | <i>flgFGH</i>         | flagellar basal rod / L-ring                           | 183.9/84.0/93.1                    | 0.001   | ChIP      |
| VC2200-2197                    | <i>flgBCDE</i>        | flagellar basal-body rod protein/hook protein E        | 155.2/36.9/51.0/47.3               | 0.001   | ChIP      |
| VC2204                         | <i>flgM</i>           | negative regulator of flagelin synthesis               | 2.8                                | 0.030   |           |
| VC2207-06                      | <i>flgOP</i>          | outer membrane proteins important for motility         | 79.5/23.5                          | 0.001   | ChIP      |
| VC2208                         | <i>flgT</i>           | flagellar assembly protein                             | 2.4                                | 0.001   | ChIP      |
| VC2601                         | <i>motX</i>           | sodium-type flagellar protein                          | 7.8                                | 0.001   |           |
| VCA0176                        |                       | methyl-accepting chemotaxis protein                    | 5.5                                | 0.001   |           |
| <b>Regulator</b>               |                       |                                                        |                                    |         |           |
| VC0291                         |                       | NifR3/Smm1 family protein                              | 2.6                                |         |           |
| VC0606-07                      | <i>glnB-1</i>         | nitrogen regulatory protein P-II                       | 32.7/14.8                          | 0.005   | ChIP      |
| VC2748                         | <i>ntrB</i>           | nitrogen regulation protein                            | 2.8                                | 0.001   | ChIP      |
| <b>Enzyme and biosynthesis</b> |                       |                                                        |                                    |         |           |
| VC0211                         | <i>pyrE</i>           | orotate phosphoribosyltransferase                      | 2.3                                | 0.003   |           |
| VC0894                         | <i>thil</i>           | thiamin biosynthesis protein                           | 2.1                                | 0.006   |           |
| VC0916                         |                       | phosphotyrosine protein phosphatase                    | 2.0                                | 0.001   |           |
| VC0934                         |                       | putative glycosyltransferase                           | 2.1                                | 0.030   |           |
| VC0991                         | <i>asnB</i>           | asparagine synthetase B, glutamine-hydrolyzing         | 3.6                                | 0.002   |           |
| VC0999                         | <i>truA</i>           | tRNA pseudouridine synthase A                          | 2.6                                | 0.020   |           |
| VC1463                         | <i>rstA2</i>          | DNA topoisomerase                                      | 2.4                                | 0.001   |           |
| VC1516-10                      |                       | formate dehydrogenase                                  | 63.9/44.6/40.7/69.4/48.1/51.6/22.3 | 0.001   | ChIP      |
| VC1519                         | <i>fdhD</i>           | formate dehydrogenase accessory protein                | 3.0                                | 0.001   | ChIP      |
| VC1523-27                      |                       | ABC transporter and molybdopterin synthesis            | 5.4/5.7/3.9/2.3/2.1                | 0.001   | ChIP      |
| VC1819                         | <i>aldA-2</i>         | aldehyde dehydrogenase                                 | 2.2                                | 0.004   |           |
| VC1929-28                      | <i>dctP2/dctQ</i>     | C4-dicarboxylate-binding periplasmic protein/transport | 5.4/2.9                            | 0.001   |           |
| VC2502                         | <i>holC</i>           | DNA polymerase III, chi subunit                        | 2.1                                | 0.002   |           |
| VC2510-11                      | <i>pyrBI</i>          | aspartate carbamoyltransferase                         | 3.2/3.2                            | 0.041   |           |
| VC2708                         | <i>gmK</i>            | guanylate kinase                                       | 2.5                                | 0.004   |           |
| VC2746                         | <i>glnA</i>           | glutamate--ammonia ligase                              | 3.4                                | 0.004   | ChIP      |
| VCA0183                        |                       | ferrisiderophore reductase                             | 2.0                                | 0.001   |           |
| VCA0804                        | <i>deaD</i>           | ATP-dependent RNA helicase                             | 2.2                                | 0.001   |           |
| <b>Unknown function</b>        |                       |                                                        |                                    |         |           |
| VC0599                         |                       | hypothetical protein                                   | 8.2                                | 0.020   |           |
| VC0912                         |                       | hypothetical protein                                   | 2.8                                | 0.001   |           |
| VC1009                         |                       | hypothetical protein                                   | 2.1                                | 0.016   |           |
| VC1058                         |                       | hypothetical protein                                   | 3.8                                | 0.002   |           |
| VC1105                         |                       | hypothetical protein                                   | 2.2                                | 0.014   |           |
| VC1124-25                      |                       | hypothetical protein/lipo protein                      | 2.1/2.3                            | 0.001   |           |
| VC1154                         |                       | hypothetical protein                                   | 3.8                                | 0.001   | ChIP      |
| VC1252                         |                       | CinA family protein                                    | 2.3                                | 0.004   |           |
| VC1386                         |                       | putative chaperone                                     | 2.8                                | 0.001   |           |
| VC1518-17                      |                       | hypothetical protein                                   | 7.5/10.9                           | 0.001   | ChIP      |

|            |               |                                           |                 |       |      |
|------------|---------------|-------------------------------------------|-----------------|-------|------|
| VC1587     |               | hypothetical protein                      | 2.9             | 0.049 |      |
| VC1678-76  | <i>pspABC</i> | phage shock proteins                      | 5.9/2.5/3.2     | 0.001 | ChIP |
| VC1699     |               | hypothetical protein                      | 3.8             | 0.012 | ChIP |
| VC1734     |               | hypothetical protein                      | 3.2             | 0.013 |      |
| VC1891     |               | hypothetical protein                      | 3.4             | 0.048 |      |
| VC1988     |               | hypothetical protein                      | 2.3             | 0.023 |      |
| VC2005     |               | hypothetical protein                      | 28.5            | 0.002 | ChIP |
| VC2046     |               | hypothetical protein                      | 7.8             | 0.001 |      |
| VC2058     |               | hypothetical protein                      | 2.4             | 0.004 |      |
| VC2507     |               | hypothetical protein                      | 2.6             | 0.001 |      |
| VC2706     |               | hypothetical protein                      | 2.5             | 0.048 |      |
| VC2717     |               | hypothetical protein                      | 4.8             | 0.002 |      |
| VCA0051-48 |               | hypothetical protein/GGDEF family protein | 2.0/2.0/2.6/2.3 | 0.001 | ChIP |
| VCA0105-06 |               | hypothetical protein                      | 17.5/14.4       | 0.001 | ChIP |
| VCA0144    |               | immunogenic protein                       | 4.9             | 0.012 | ChIP |
| VCA0146    |               | hypothetical protein                      | 2.4             | 0.030 |      |
| VCA0187    |               | hypothetical protein                      | 3.4             | 0.046 |      |
| VCA0195    |               | hypothetical protein                      | 4.6             | 0.002 | ChIP |
| VCA0284-86 |               | hypothetical protein                      | 47.3/34.9/19.4  | 0.001 | ChIP |
| VCA0659    |               | OmpA family protein                       | 3.7             | 0.002 |      |
| VCA0734    |               | hypothetical protein                      | 3.1             | 0.003 | ChIP |
| VCA1016    |               | putative lipoprotein                      | 4.3             | 0.010 | ChIP |

**Table S4**

| <b>Gene</b> | <b>Synonym</b> | <b>Function</b>                                                    | <b>Ratio<br/>(pRpoN/pBAD)</b> | <b>P-value</b> |
|-------------|----------------|--------------------------------------------------------------------|-------------------------------|----------------|
| VC0023      |                | hypothetical protein                                               | 0.51                          | 0.044          |
| VC0030      | <i>ilvM</i>    | acetolactate synthase II, small subunit                            | 0.50                          | 0.013          |
| VC0076      | <i>uspA</i>    | universal stress protein A                                         | 0.43                          | 0.002          |
| VC0101      |                | hypothetical protein                                               | 0.18                          | 0.009          |
| VC0162      | <i>ilvC</i>    | ketol-acid reductoisomerase                                        | 0.34                          | 0.007          |
| VC0171      |                | peptide ABC transporter, periplasmic peptide-binding protein       | 0.42                          | 0.006          |
| VC0193      |                | hypothetical protein                                               | 0.27                          | 0.010          |
| VC0287      | <i>gntV</i>    | thermoresistant gluconokinase                                      | 0.39                          | 0.020          |
| VC0479      |                | hypothetical protein                                               | 0.50                          | 0.014          |
| VC0488      |                | extracellular solute-binding protein, putative                     | 0.46                          | 0.000          |
| VC0583      |                | hemagglutinin/protease regulatory protein, authentic frameshift    | 0.24                          | 0.000          |
| VC0654      |                | conserved hypothetical protein                                     | 0.34                          | 0.021          |
| VC0765      |                | conserved hypothetical protein                                     | 0.44                          | 0.006          |
| VC0800      | <i>citX</i>    | apo-citrate lyase phosphoribosyl-dephospho-CoA transferase         | 0.42                          | 0.003          |
| VC0801      | <i>citG</i>    | triphosphoribosyl-dephospho-CoA synthase CitG                      | 0.47                          | 0.021          |
| VC0802      |                | hypothetical protein                                               | 0.48                          | 0.039          |
| VC0872      |                | conserved hypothetical protein                                     | 0.47                          | 0.022          |
| VC0957      |                | conserved hypothetical protein                                     | 0.44                          | 0.014          |
| VC0975      |                | conserved hypothetical protein                                     | 0.41                          | 0.000          |
| VC0976      |                | conserved hypothetical protein                                     | 0.39                          | 0.000          |
| VC0988      |                | proton/peptide symporter family protein                            | 0.45                          | 0.001          |
| VC1080      |                | hypothetical protein                                               | 0.39                          | 0.025          |
| VC1083      |                | hypothetical protein                                               | 0.49                          | 0.007          |
| VC1103      |                | ABC transporter, ATP-binding protein                               | 0.49                          | 0.021          |
| VC1114      | <i>bioC</i>    | biotin synthesis protein BioC                                      | 0.31                          | 0.022          |
| VC1133      | <i>hisD</i>    | histidinol dehydrogenase                                           | 0.46                          | 0.002          |
| VC1135      | <i>hisB</i>    | imidazoleglycerol-phosphate dehydratase/histidinol-phosphatase     | 0.51                          | 0.012          |
| VC1138      | <i>hisF</i>    | hisF protein (cyclase)                                             | 0.50                          | 0.009          |
| VC1157      |                | response regulator                                                 | 0.47                          | 0.032          |
| VC1280      |                | hypothetical protein                                               | 0.44                          | 0.003          |
| VC1283      | <i>celC</i>    | PTS system, cellobiose-specific IIA component                      | 0.37                          | 0.030          |
| VC1294      |                | hypothetical protein                                               | 0.36                          | 0.004          |
| VC1360      |                | amino acid ABC transporter, permease protein                       | 0.41                          | 0.012          |
| VC1368      |                | hypothetical protein                                               | 0.48                          | 0.004          |
| VC1433      |                | conserved hypothetical protein                                     | 0.49                          | 0.006          |
| VC1484      | <i>rmf</i>     | ribosome modulation factor                                         | 0.40                          | 0.001          |
| VC1528      |                | hypothetical protein                                               | 0.51                          | 0.008          |
| VC1529      |                | hypothetical protein                                               | 0.33                          | 0.005          |
| VC1589      | <i>aldC</i>    | alpha-acetolactate decarboxylase                                   | 0.24                          | 0.006          |
| VC1590      | <i>alsS</i>    | acetolactate synthase, catabolic                                   | 0.21                          | 0.003          |
| VC1591      |                | oxidoreductase, short-chain dehydrogenase/reductase family         | 0.24                          | 0.012          |
| VC1696      |                | hypothetical protein                                               | 0.42                          | 0.002          |
| VC1809      |                | transcriptional regulator, putative                                | 0.39                          | 0.004          |
| VC1825      |                | transcriptional regulator                                          | 0.44                          | 0.013          |
| VC1853      |                | conserved hypothetical protein                                     | 0.49                          | 0.005          |
| VC1863      |                | amino acid ABC transporter, periplasmic amino acid-binding protein | 0.51                          | 0.028          |
| VC1873      |                | conserved hypothetical protein                                     | 0.51                          | 0.002          |
| VC1991      |                | hypothetical protein                                               | 0.39                          | 0.000          |
| VC1992      | <i>purU</i>    | formyltetrahydrofolate deformylase                                 | 0.51                          | 0.013          |
| VC2010      |                | hypothetical protein                                               | 0.50                          | 0.002          |
| VC2070      | <i>sixA</i>    | phosphohistidine phosphatase                                       | 0.47                          | 0.008          |
| VC2078      | <i>feoA</i>    | ferrous iron transport protein A                                   | 0.48                          | 0.032          |



|         |               |                                                                |      |       |
|---------|---------------|----------------------------------------------------------------|------|-------|
| VC2145  |               | tyrA protein                                                   | 0.51 | 0.000 |
| VC2216  |               | conserved hypothetical protein                                 | 0.51 | 0.006 |
| VC2220  |               | conserved hypothetical protein                                 | 0.51 | 0.002 |
| VC2221  |               | hypothetical protein                                           | 0.36 | 0.045 |
| VC2351  |               | hypothetical protein                                           | 0.46 | 0.000 |
| VC2362  | <i>thrC</i>   | threonine synthase                                             | 0.44 | 0.007 |
| VC2364  | <i>thrA</i>   | aspartokinase I/homoserine dehydrogenase, threonine-sensitive  | 0.40 | 0.001 |
| VC2448  | <i>pyrG</i>   | CTP synthase                                                   | 0.47 | 0.001 |
| VC2490  | <i>leuA</i>   | 2-isopropylmalate synthase                                     | 0.46 | 0.006 |
| VC2491  | <i>leuB</i>   | 3-isopropylmalate dehydrogenase                                | 0.46 | 0.013 |
| VC2492  | <i>leuC</i>   | 3-isopropylmalate dehydratase, large subunit                   | 0.49 | 0.005 |
| VC2493  | <i>leuD</i>   | 3-isopropylmalate dehydratase, small subunit                   | 0.47 | 0.019 |
| VC2754  |               | hypothetical protein                                           | 0.51 | 0.003 |
| VCA0013 | <i>malP</i>   | maltodextrin phosphorylase                                     | 0.49 | 0.001 |
| VCA0014 | <i>malQ</i>   | 4-alpha-glucanotransferase                                     | 0.50 | 0.000 |
| VCA0034 |               | conserved hypothetical protein                                 | 0.50 | 0.049 |
| VCA0043 |               | conserved hypothetical protein                                 | 0.51 | 0.001 |
| VCA0053 | <i>deoD-2</i> | purine nucleoside phosphorylase                                | 0.41 | 0.046 |
| VCA0072 | <i>pstA-2</i> | phosphate ABC transporter, permease protein                    | 0.47 | 0.012 |
| VCA0078 |               | hypothetical protein                                           | 0.45 | 0.000 |
| VCA0130 | <i>rbsB</i>   | ribose ABC transporter, periplasmic D-ribose-binding protein   | 0.50 | 0.003 |
| VCA0231 |               | transcriptional regulator, AraC/XylS family                    | 0.50 | 0.032 |
| VCA0270 | <i>dacA-2</i> | D-alanyl-D-alanine carboxypeptidase                            | 0.51 | 0.003 |
| VCA0274 | <i>cah</i>    | carbonic anhydrase                                             | 0.40 | 0.000 |
| VCA0279 |               | transcriptional regulator, HTH_3 family                        | 0.48 | 0.015 |
| VCA0306 |               | hypothetical protein                                           | 0.40 | 0.035 |
| VCA0316 |               | acetyltransferase, putative                                    | 0.49 | 0.019 |
| VCA0328 |               | glyoxalase family protein                                      | 0.43 | 0.037 |
| VCA0336 |               | hypothetical protein                                           | 0.46 | 0.011 |
| VCA0421 |               | hypothetical protein                                           | 0.51 | 0.050 |
| VCA0465 |               | hypothetical protein                                           | 0.35 | 0.012 |
| VCA0523 |               | aminotransferase, class II                                     | 0.51 | 0.023 |
| VCA0536 |               | conserved hypothetical protein                                 | 0.34 | 0.006 |
| VCA0540 |               | formate transporter 1, putative                                | 0.46 | 0.031 |
| VCA0562 |               | hypothetical protein                                           | 0.49 | 0.030 |
| VCA0610 | <i>elbB</i>   | enhancing lycopene biosynthesis protein 2                      | 0.42 | 0.035 |
| VCA0623 | <i>talB</i>   | transaldolase B                                                | 0.51 | 0.007 |
| VCA0647 |               | hypothetical protein                                           | 0.30 | 0.006 |
| VCA0702 |               | iron-containing alcohol dehydrogenase                          | 0.46 | 0.006 |
| VCA0716 |               | conserved hypothetical protein                                 | 0.43 | 0.000 |
| VCA0743 |               | conserved hypothetical protein                                 | 0.33 | 0.007 |
| VCA0759 | <i>artI</i>   | arginine ABC transporter, periplasmic arginine-binding protein | 0.42 | 0.004 |
| VCA0784 |               | hypothetical protein                                           | 0.47 | 0.049 |
| VCA0823 | <i>ectC</i>   | ectoine synthase                                               | 0.47 | 0.000 |
| VCA0886 | <i>kbl</i>    | 2-amino-3-ketobutyrate coenzyme A ligase                       | 0.41 | 0.009 |
| VCA0902 |               | hypothetical protein                                           | 0.49 | 0.004 |
| VCA1001 |               | transcriptional regulator, AraC/XylS family                    | 0.48 | 0.016 |
| VCA1100 |               | ABC transporter, permease protein                              | 0.49 | 0.026 |
| VCA1107 |               | hypothetical protein                                           | 0.51 | 0.016 |
